# Supplementary material for: Highly defective and conductive Cu-doped 1T/2H-MoS 2 nanosheets as high-capacity cathode materials for enhanced magnesium-ion storage
Source: Royal Society of Chemistry journal article supplement (doi:10.1039/d4qi02064b), 2024-01-01
Supplement: d4qi02064b1.pdf [file d4qi02064b1.pdf]

## **Supporting information:**

### **Highly defective and conductive Cu-doped 1T/2H-MoS<sub>2</sub> nanosheets as high-capacity cathode materials for enhanced magnesium ion storage**

Ao Xu,<sup>a,#</sup> Yan Liu,<sup>a,#</sup> Jiahui Wang,<sup>a</sup> Yijing Wang,<sup>b</sup> Fuyi Jiang,<sup>a,\*</sup> and Yanli Zhou<sup>a,\*</sup>

*<sup>a</sup>School of Environment and Material Engineering, Yantai University, Yantai 264005, PR China*

*<sup>b</sup>Key Laboratory of Advanced Energy Materials Chemistry (Ministry of Education), Nankai University, Tianjin 300071, China*

Corresponding author: [fyjiang@ytu.edu.cn](mailto:fyjiang@ytu.edu.cn); [zhouyanli@ytu.edu.cn](mailto:zhouyanli@ytu.edu.cn)

*Ao Xu, and Yan Liu were the co-first authors in this work.*

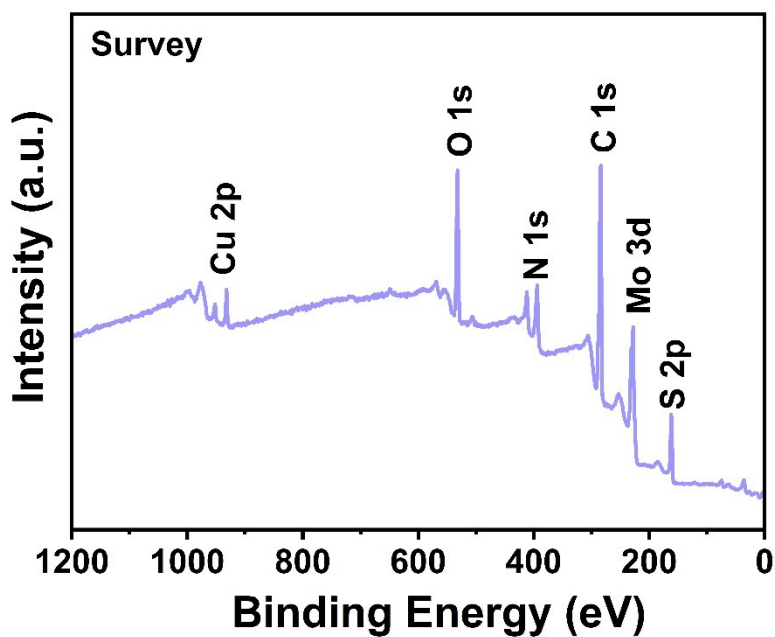

Fig. S1 XPS survey spectrum of Cu-MoS<sub>2</sub>-2.

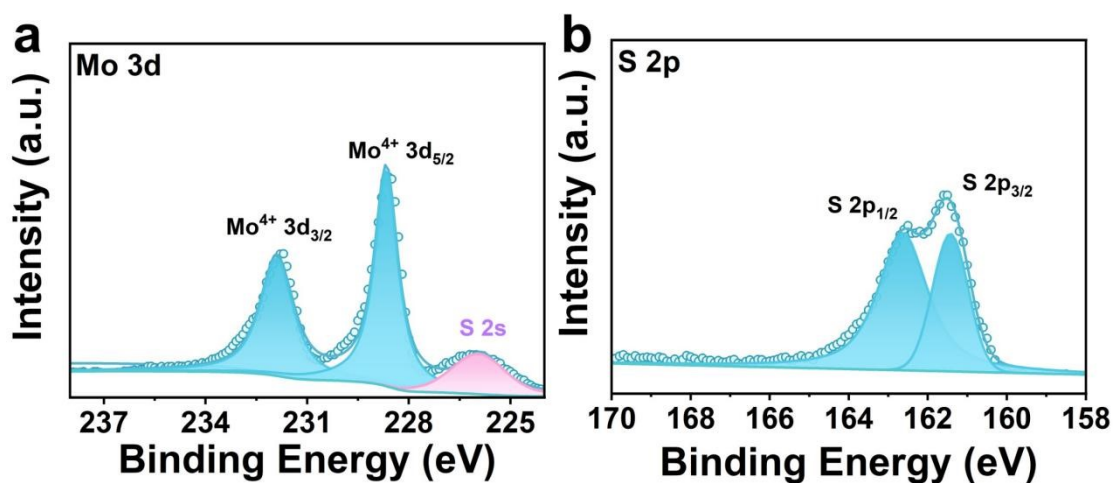

Fig. S2 XPS survey spectrum of MoS<sub>2</sub>.

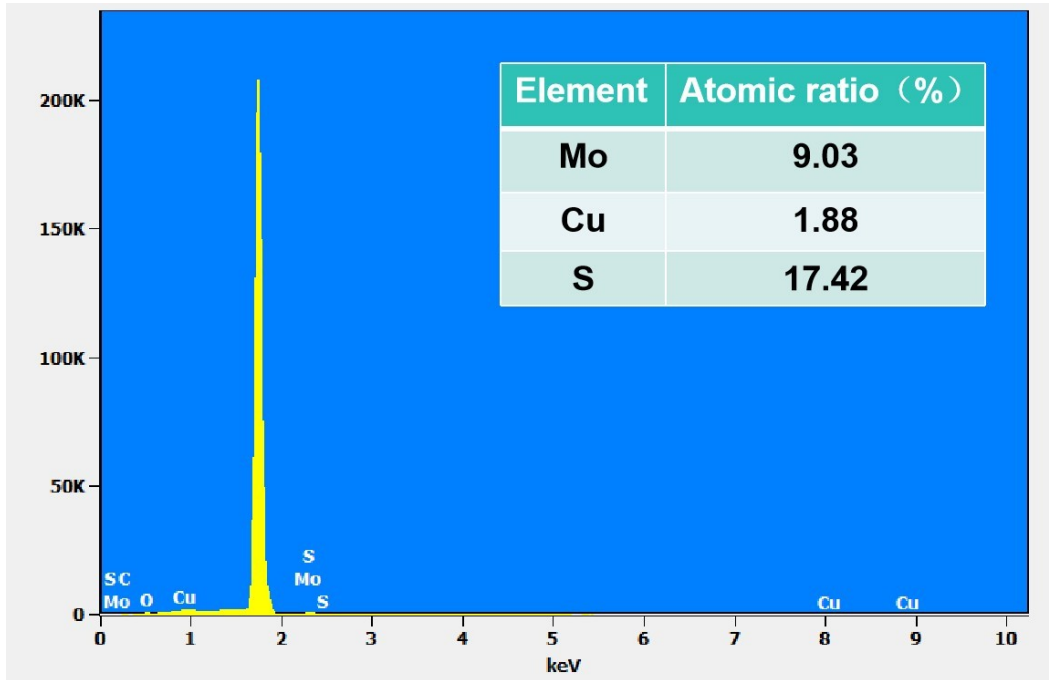

Fig. S3 EDS spectrum of Cu-MoS<sub>2</sub>-2.

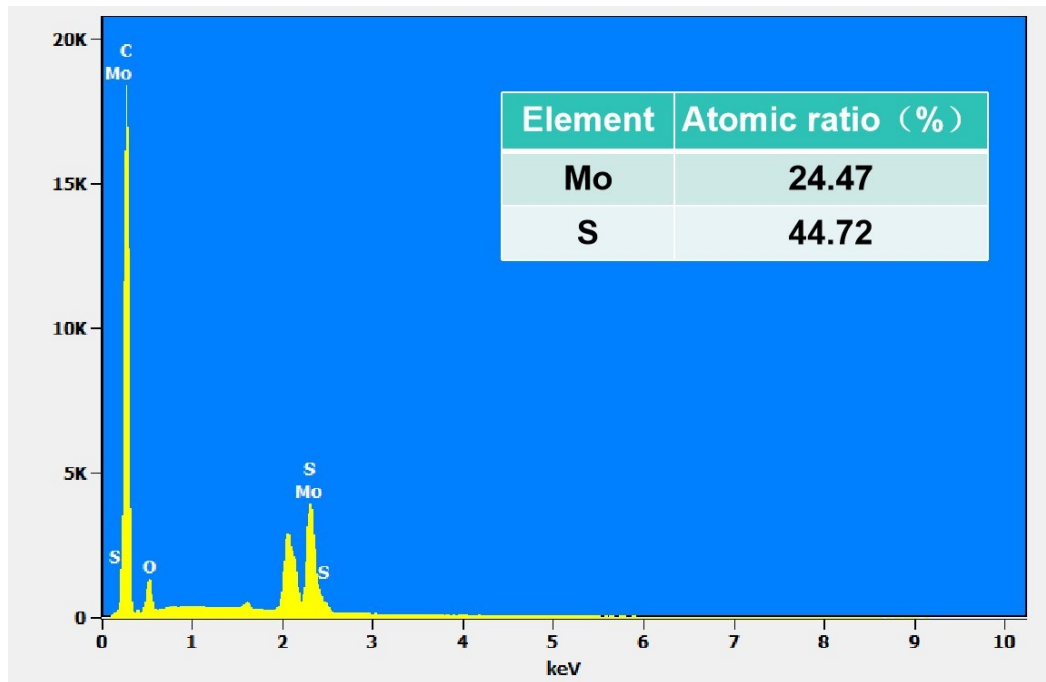

Fig. S4 EDS spectrum of MoS<sub>2</sub>.

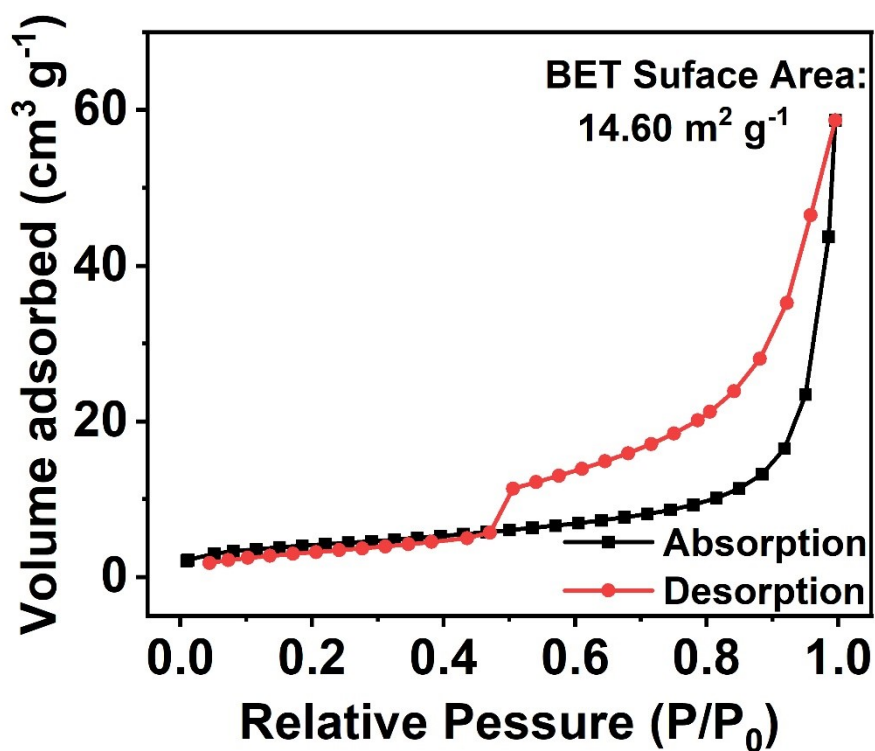

Fig. S5 Nitrogen isothermal adsorption/desorption curves of Cu-MoS<sub>2</sub>-2.

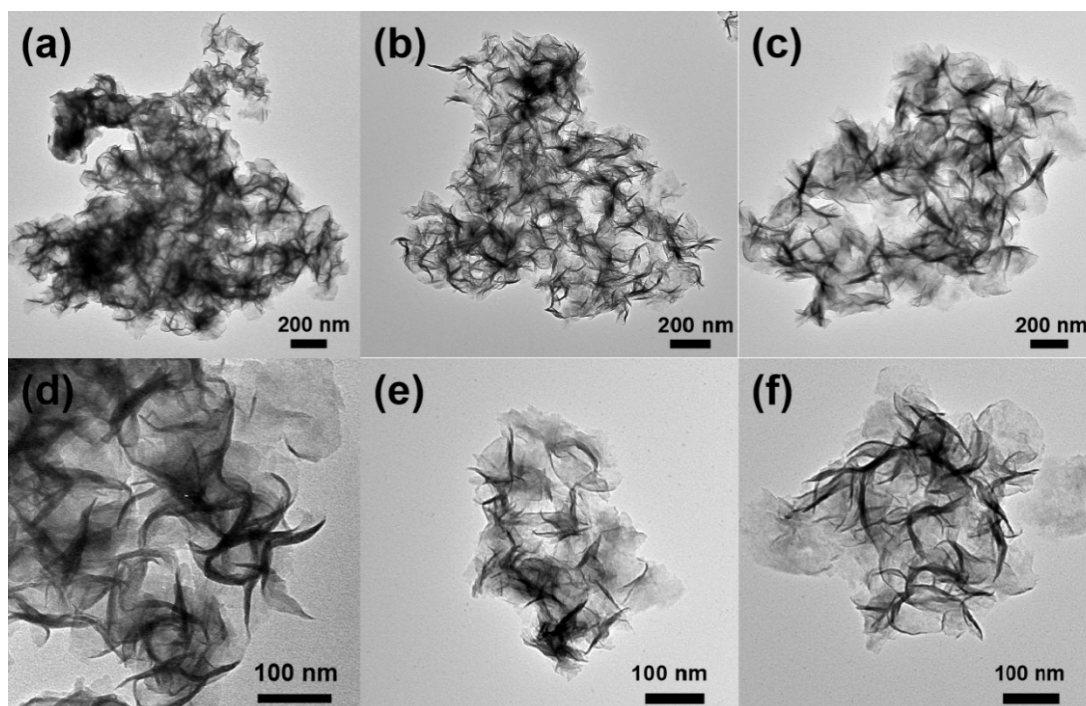

Fig. S6 TEM images of (a-d) MoS<sub>2</sub>, (b-e) Cu-MoS<sub>2</sub>-1, and (c-f) Cu-MoS<sub>2</sub>-3.

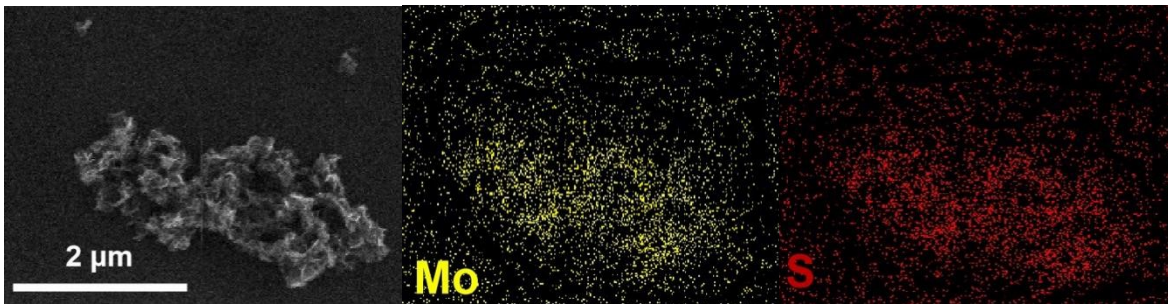

Fig. S7 EDS elemental mappings of MoS<sub>2</sub>.

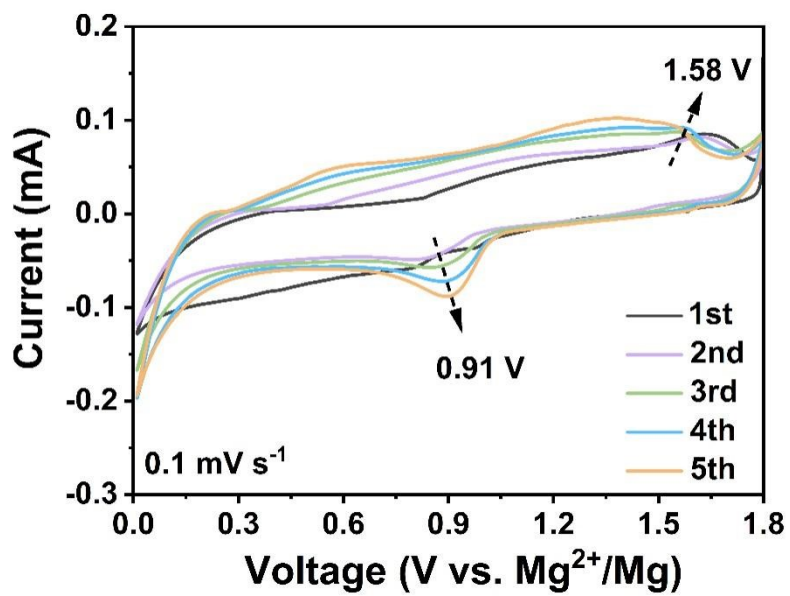

Fig. S8 CV curves of MoS<sub>2</sub> for the first five cycles.

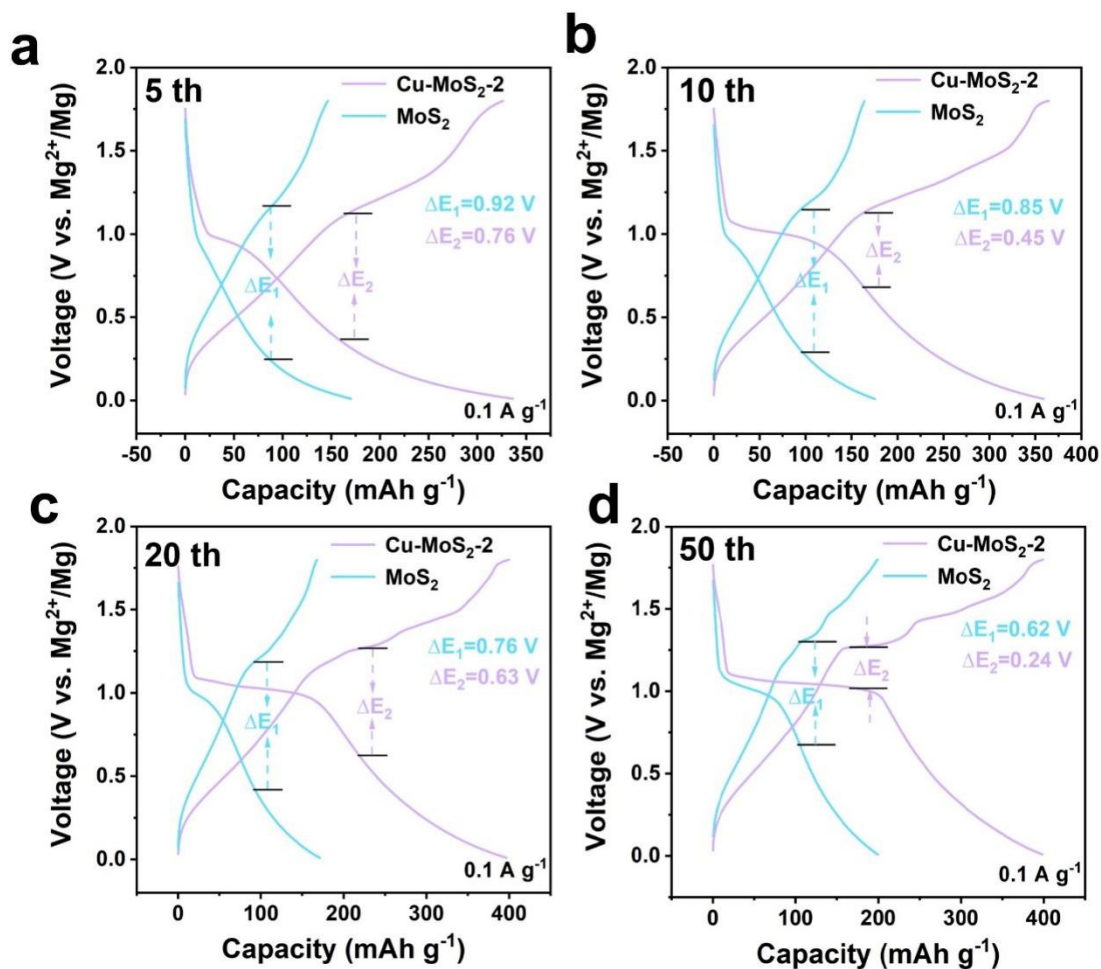

**Fig. S9** (a-d) Discharge/charge profiles for different cycles at  $0.1 \text{ A g}^{-1}$  of  $\text{Cu-MoS}_2\text{-2}$  and  $\text{MoS}_2$ .

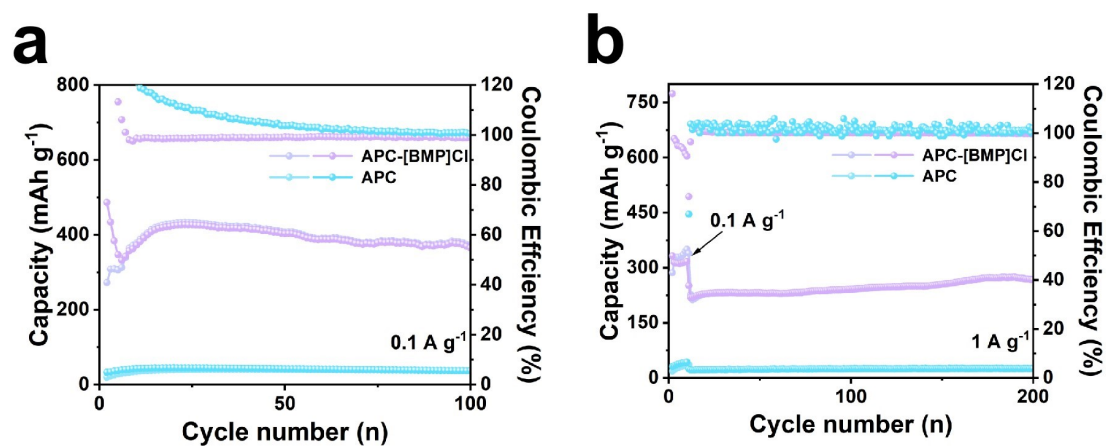

**Fig. S10** Cyclic performances of  $\text{Cu-MoS}_2\text{-2}$  in APC and APC-[BMP]Cl electrolytes: (a)  $0.1 \text{ A g}^{-1}$ , and (b)  $1.0 \text{ A g}^{-1}$ .

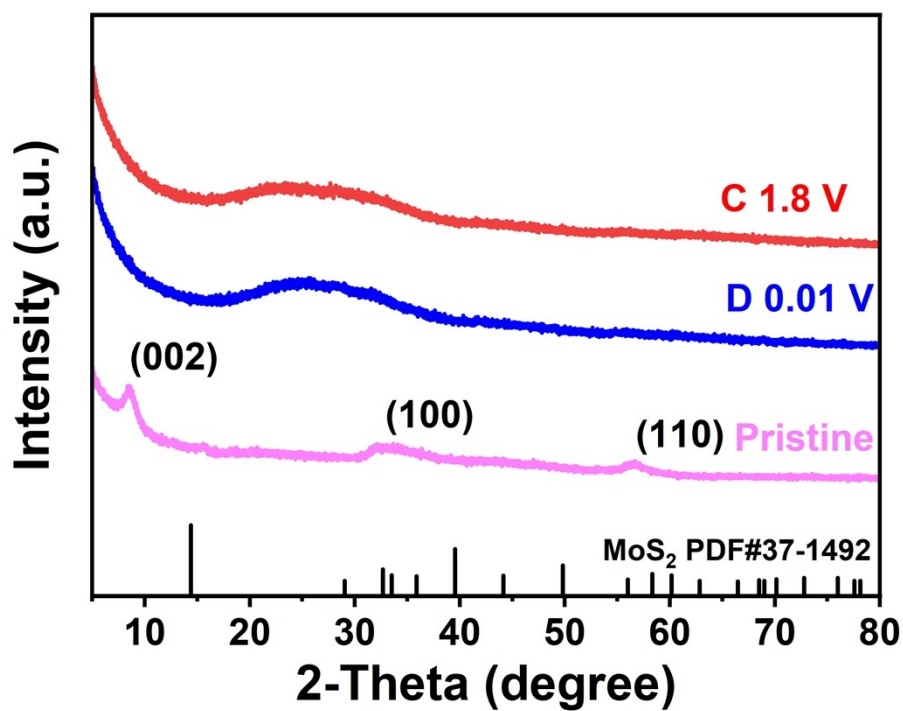

Fig. S11 *Ex-situ* XRD patterns of Cu-MoS<sub>2</sub>-2 at different discharge/charge states.

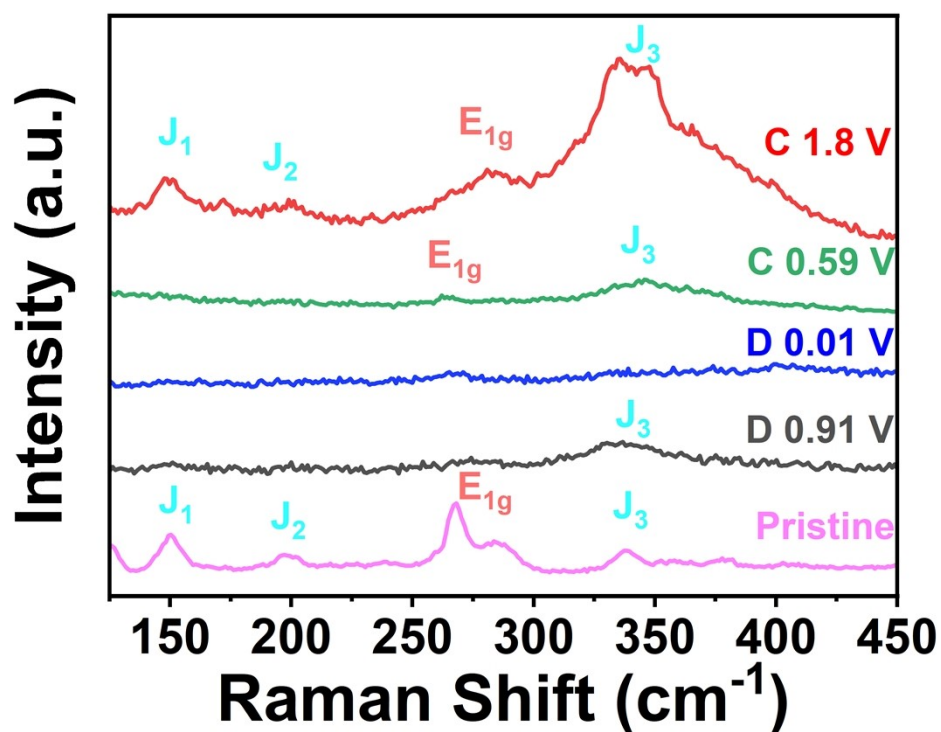

Fig. S12 *Ex-situ* Raman spectra of Cu-MoS<sub>2</sub>-2 at different discharge/charge states.

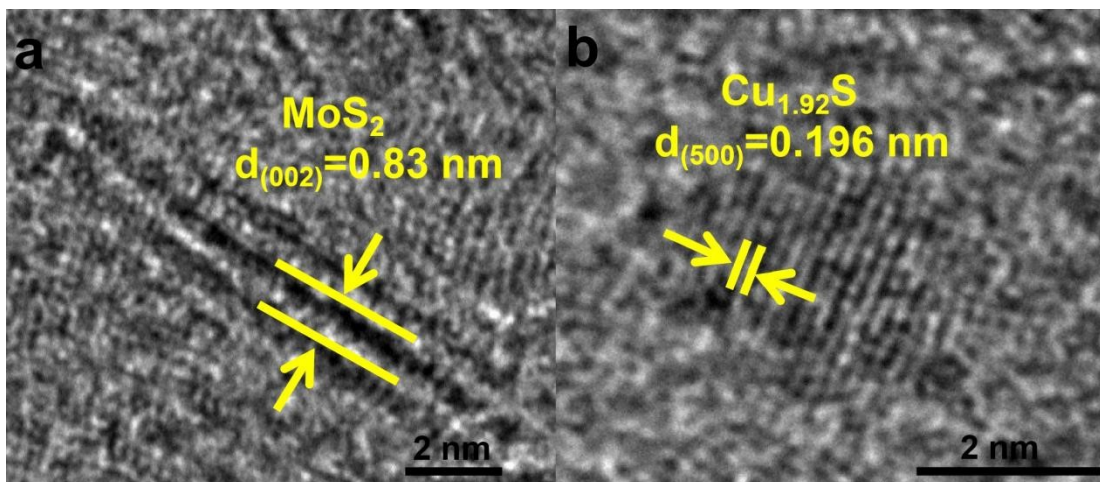

Fig. S13 (a) and (b) HRTEM images of Cu-MoS<sub>2</sub>-2 after charging to 1.8 V.

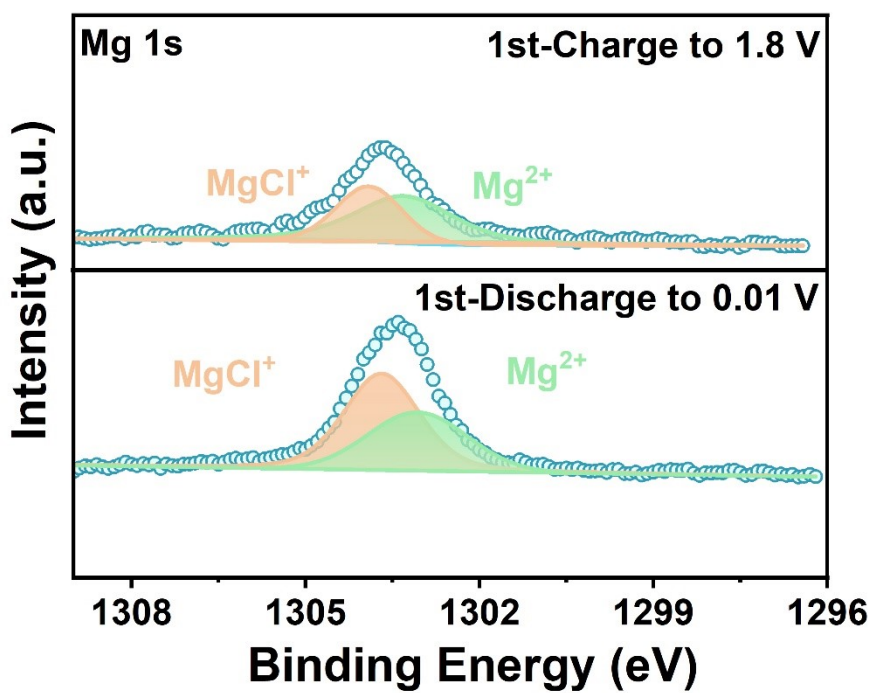

Fig. S14 *Ex-situ* XPS spectra of Mg 1s.



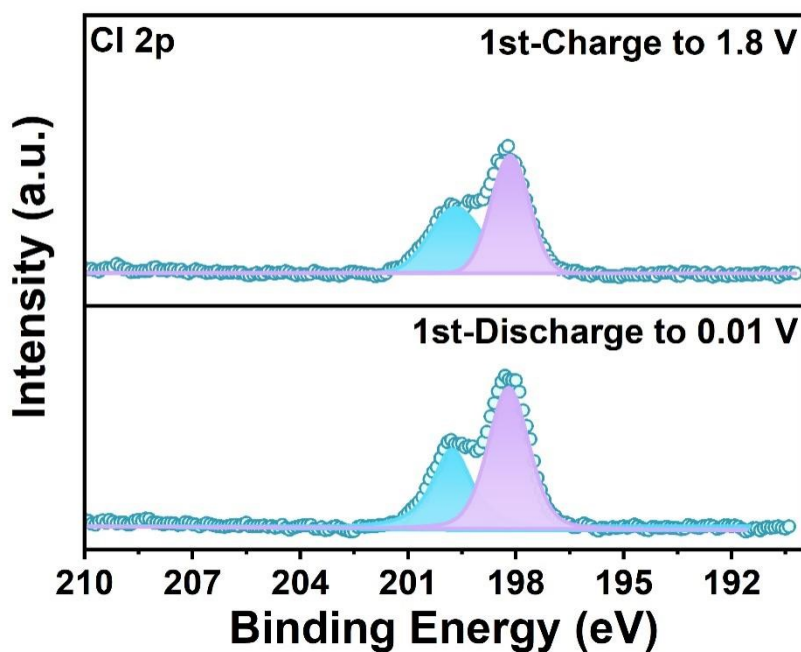

Fig. S15 *Ex-situ* XPS spectra of Cl 2p.

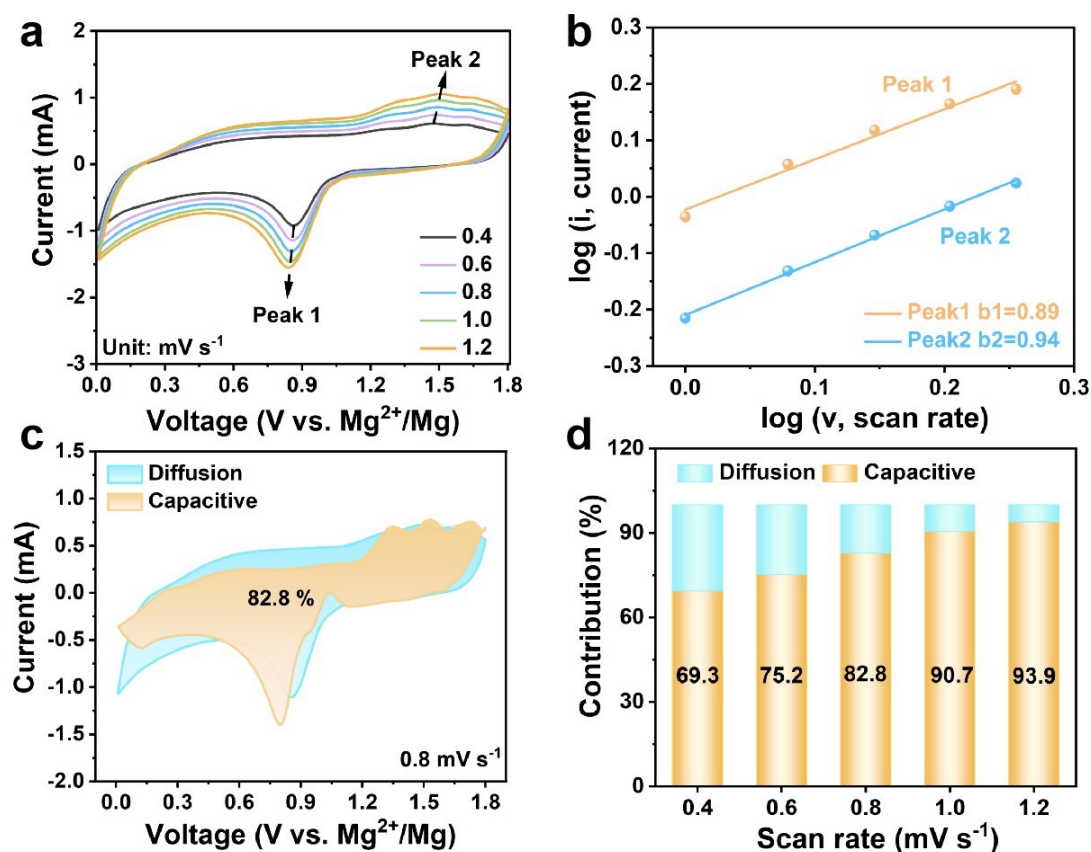

Fig. S16 Kinetic analysis of MoS<sub>2</sub>: (a) CV curves at different scan rates, (b)  $b$  values obtained from  $\log i$  versus  $\log v$ , (c) percentage of capacitive contributions at 0.8 mV s<sup>-1</sup>, (d) percentage of capacitive contributions at different scan rates.

**Table S1** Electric conductivity data at different pressures of MoS<sub>2</sub> and Cu-MoS<sub>2</sub>-2 via the four probe method.

| Electrode materials    | Height (mm)                 | Pressure (Mpa) | Temperature (°C) | Humidness (%RH) | Electric conductivity (S m <sup>-1</sup> ) |
|------------------------|-----------------------------|----------------|------------------|-----------------|--------------------------------------------|
| <b>MoS<sub>2</sub></b> | 0.94                        | 18.3           | 25               | 50              | 0.0077                                     |
|                        | 0.97                        | 16.07          | 25               | 50              | 0.0070                                     |
|                        | 0.98                        | 14.07          | 25               | 50              | 0.0049                                     |
|                        | 1                           | 12.07          | 25               | 50              | 0.0042                                     |
|                        | 1.04                        | 10.17          | 25               | 50              | 0.0037                                     |
|                        | 1.07                        | 8              | 25               | 50              | 0.0031                                     |
|                        | 1.1                         | 6.11           | 25               | 50              | 0.0026                                     |
|                        | 1.12                        | 4.3            | 25               | 50              | 0.0022                                     |
|                        | 1.14                        | 2.24           | 25               | 50              | 0.0018                                     |
|                        | <b>Cu-MoS<sub>2</sub>-2</b> | 0.88           | 18.25            | 25              | 50                                         |
| 0.96                   |                             | 16.12          | 25               | 50              | 1.3736                                     |
| 0.97                   |                             | 14.28          | 25               | 50              | 1.1990                                     |
| 0.98                   |                             | 12.45          | 25               | 50              | 1.0330                                     |
| 1                      |                             | 10.24          | 25               | 50              | 0.4545                                     |
| 1.03                   |                             | 8.33           | 25               | 50              | 0.1852                                     |
| 1.16                   |                             | 6.06           | 25               | 50              | 0.0980                                     |
| 1.21                   |                             | 4.22           | 25               | 50              | 0.0390                                     |
|                        | 1.29                        | 2.34           | 25               | 50              | 0.0128                                     |

**Table S2** Reaction impedance derived from EIS spectra.

| Electrode materials    | $R_s$ ( $\Omega$ ) | $R_{SEI}$ ( $\Omega$ ) | $R_{ct}$ ( $\Omega$ ) |
|------------------------|--------------------|------------------------|-----------------------|
| MoS <sub>2</sub>       | 26.68              | 18.93                  | 28.17                 |
| Cu-MoS <sub>2</sub> -1 | 19.38              | 15.91                  | 26.66                 |
| Cu-MoS <sub>2</sub> -2 | 18.36              | 11.17                  | 26.38                 |
| Cu-MoS <sub>2</sub> -3 | 19.21              | 12.41                  | 25.66                 |

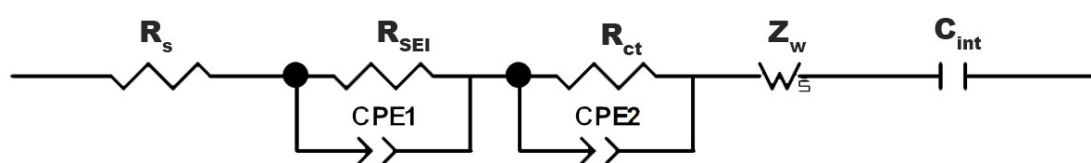

**Fig. S17** Diagram of equivalent circuit.
